# Supplementary material
Source: PubMed Central journal article supplement (PMC7007868)
Supplement: NIHMS1541181-supplement-1.pdf [file NIHMS1541181-supplement-1.pdf]

## Supplemental Figure 1

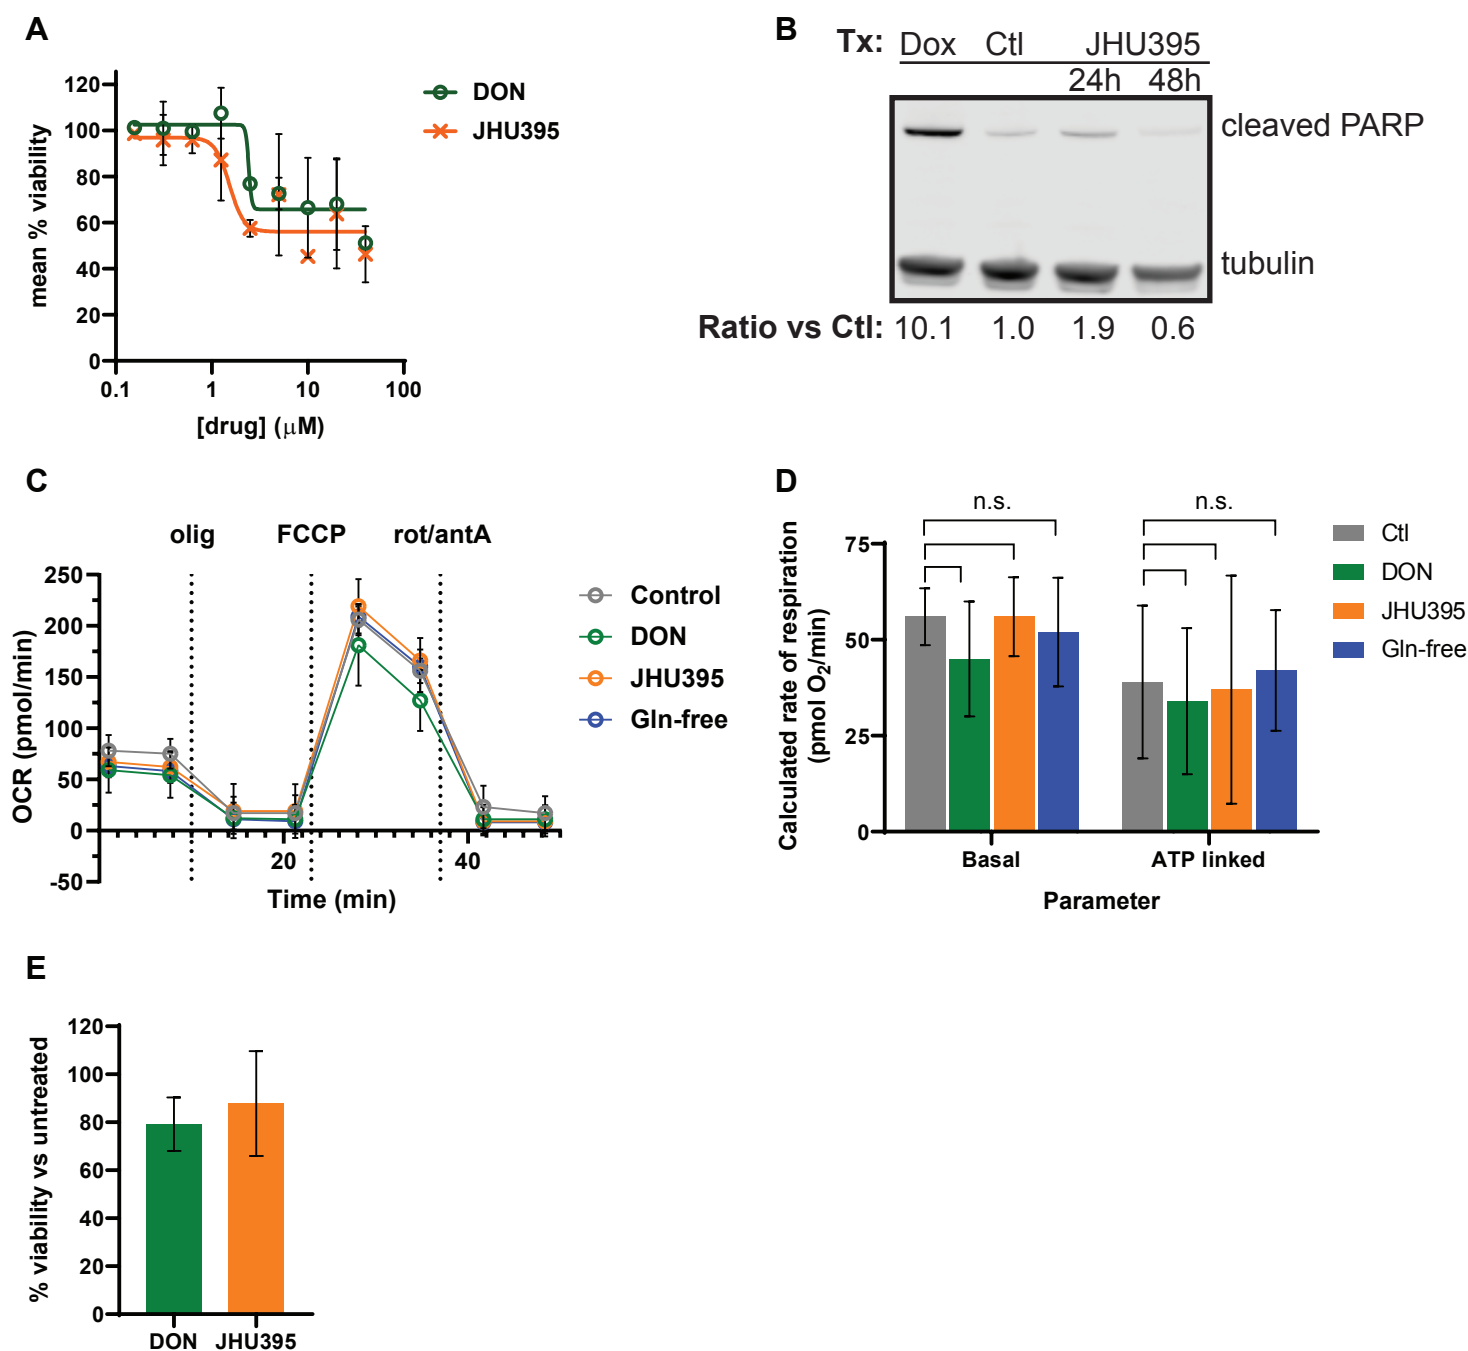

**Supplemental Figure 1:** A) Percent viable sNF02.2 MPNST cells based on alamar blue fluorescence normalized to untreated controls following treatment with DON or JHU395. Viability was measured at 72 hours DON treatment. Data is  $\pm$  S.D. B) Western blot for cleaved PARP in sNF96.2 cells treated with doxorubicin (Dox; 820 nM 24h), untreated (Ctl; 24h), or JHU395 (10  $\mu\text{M}$  24 or 48h). Cleaved PARP band was normalized to tubulin and ratio compared to Ctl lane is shown below the blot. C) Oxygen consumption rate (OCR; pmol/min) measured in sNF96.2 cells following 24h treatment with vehicle (Control), DON (10 $\mu\text{M}$ ), JHU395 (10 $\mu\text{M}$ ), or glutamine-free media. OCR was measured before and following exposure of cells to oligomycin (olig; 2  $\mu\text{M}$ ), carbonyl cyanide 4-(trifluoromethoxy)phenylhydrazone (FCCP; 2  $\mu\text{M}$ ), or rotenone/antimycin A (rot; 0.5  $\mu\text{M}$ ). Each point represents the average of at least six technical replicates and data is representative of two independent experiments  $\pm$  S.D. D) Calculated rate of basal and ATP-linked respiration calculated based on the data shown in C. Error bars indicate  $\pm$  S.D. Statistical testing was done by ANOVA with Dunnet's multiple comparisons test. E) Percent viable sNF96.2 cells based on alamar blue fluorescence normalized to untreated controls following treatment with DON or JHU395 (10  $\mu\text{M}$ ) for 24 hours. Cells plated under same conditions as OCR assay. Data is  $\pm$  S.D.
