# Supplementary material
Source: PubMed Central journal article supplement (PMC7007868)
Supplement: NIHMS1541181-supplement-3.pdf [file NIHMS1541181-supplement-3.pdf]

### Supplemental Figure 3

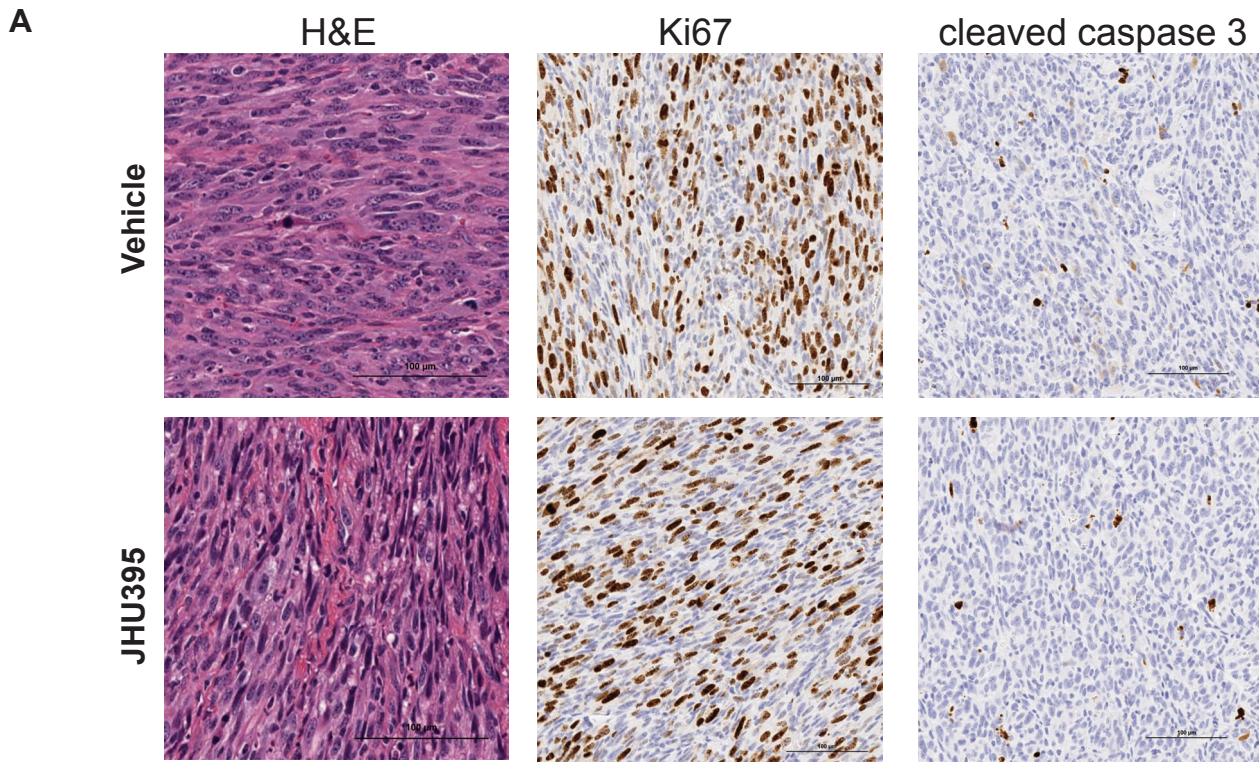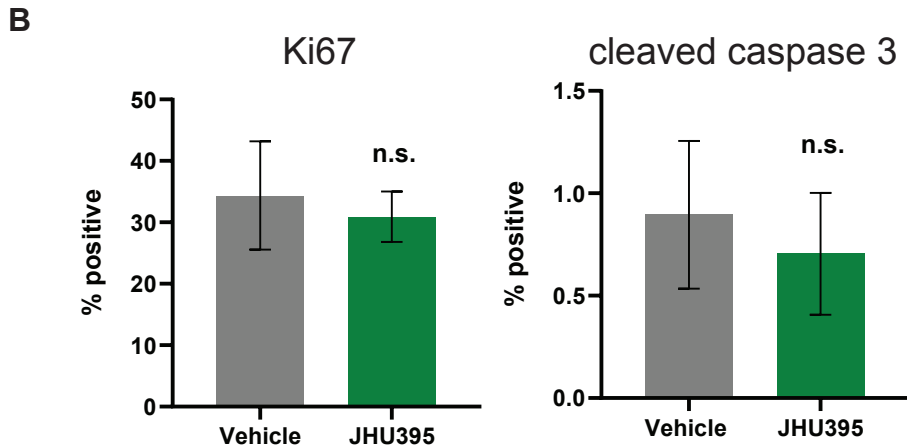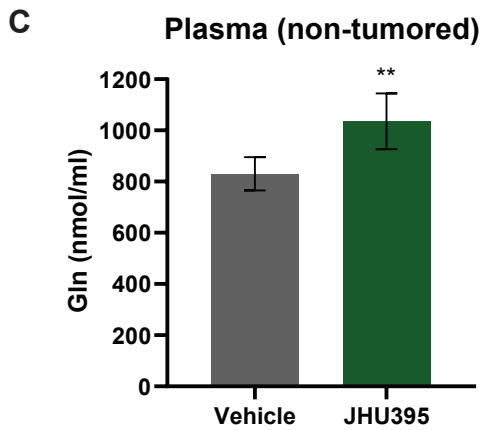

**Supplemental Figure 3:** A) Representative H&E, Ki67, and cleaved caspase-3 stained images of murine flank MPNST from vehicle or JHU395 treatment groups at study termination. Scalebar = 100  $\mu$ m. B) Quantification of percent Ki67 or cleaved caspase-3 cells per group based on analysis of five regions per tumor, n = 3 tumors per treatment group. Statistical testing done by Student's t-test. C) Plasma glutamine quantified in JHU395- and vehicle-treated non-tumored B6 mice. Data shown is mean  $\pm$  SD. \*\* 0.001 < p  $\leq$  0.01 by Student's t-test.
