# Supplementary material
Source: PubMed Central journal article supplement (PMC7007868)
Supplement: NIHMS1541181-supplement-4.pdf [file NIHMS1541181-supplement-4.pdf]

## Supplemental Figure 4

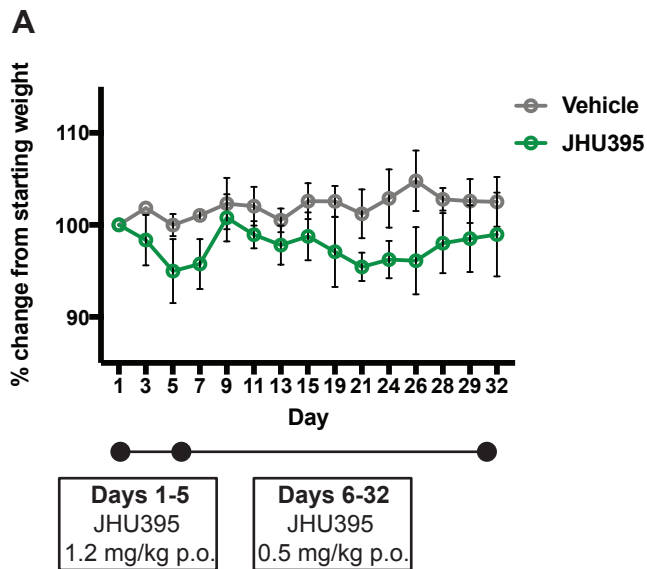

**Supplemental Figure 4:** A) Average weight change from baseline in NPcis *NF1*<sup>+/-</sup>;*p53*<sup>+/-</sup> mice treated with vehicle (PBS + 1% Tween-80 + 2.5% ethanol p.o. daily x 32 days; n=3) or JHU395 (1.2 mg/kg/day p.o. x 5 days, then 0.5 mg/kg p.o. x 27 days; n=5) for over one month.
