# Supplementary material
Source: PubMed Central journal article supplement (PMC7007868)
Supplement: NIHMS1541181-supplement-6.pdf [file NIHMS1541181-supplement-6.pdf]

**Supplemental Table 1:** Metabolites with fold change threshold > 2 and statistical significance following JHU395 treatment of murine flank MPNST.

| Name                                                | FC      | log <sub>2</sub> (FC) | raw.pvalue | -log <sub>10</sub> (p) |
|-----------------------------------------------------|---------|-----------------------|------------|------------------------|
| Phosphoribosyl- <i>N</i> -formylglycineamide (FGAR) | 9057.1  | 13.145                | 3.08E-19   | 18.511                 |
| glutamate, gamma-methyl ester                       | 0.1214  | -3.0422               | 2.07E-11   | 10.684                 |
| alpha-ketoglutaramate                               | 4.5535  | 2.187                 | 1.08E-08   | 7.9654                 |
| orotate                                             | 2.3709  | 1.2454                | 1.29E-05   | 4.8902                 |
| dihydroorotate                                      | 8.4022  | 3.0708                | 0.00017    | 3.7688                 |
| imidazole propionate                                | 0.45299 | -1.1424               | 0.000796   | 3.099                  |
| UDP- <i>N</i> -acetylglucosamine/galactosamine      | 2.1906  | 1.1313                | 0.017585   | 1.7549                 |
| <i>p</i> -cresol sulfate                            | 4.2265  | 2.0794                | 0.019582   | 1.7081                 |
| 2'-deoxyguanosine                                   | 0.48736 | -1.0369               | 0.019706   | 1.7054                 |
| methionine sulfone                                  | 0.16489 | -2.6005               | 0.021361   | 1.6704                 |
| UMP                                                 | 2.3306  | 1.2207                | 0.023252   | 1.6335                 |
| <i>N</i> -methylproline                             | 0.46553 | -1.1031               | 0.029478   | 1.5305                 |
| UDP-glucose                                         | 2.206   | 1.1414                | 0.031706   | 1.4989                 |
| 3'-AMP                                              | 2.3378  | 1.2252                | 0.062318   | 1.2054                 |
| 2'-deoxyadenosine                                   | 0.19337 | -2.3706               | 0.068141   | 1.1666                 |
| gluconate                                           | 0.49854 | -1.0042               | 0.075449   | 1.1223                 |
| <i>N</i> 6, <i>N</i> 6-dimethyllysine               | 0.33127 | -1.5939               | 0.078196   | 1.1068                 |
| <i>S</i> -1-pyrroline-5-carboxylate                 | 0.48527 | -1.0432               | 0.09553    | 1.0199                 |
